# Supplementary material for: Reconsideration of codon-anticodon wobble pairings in translation: decoding tables
Source: Preprints.org preprint supplement (doi:10.20944/preprints202312.2074.v1), 2023-12-27
Supplement: Supplementary file 2 [file supplementary]

|                        |   | codon a.a. | anticodon | tDNA                   | codon a.a.  | anticodon | tDNA | codon a.a. | anticodon | tDNA | codon a.a. | anticodon      | tDNA      |
|------------------------|---|------------|-----------|------------------------|-------------|-----------|------|------------|-----------|------|------------|----------------|-----------|
| codon<br>1st<br>letter | U | UUU        | Phe       | t-GAA                  | -           | UCU       | Ser  | t-GGA      | -         | UAU  | Tyr        | qGU( $\psi$ )A | -         |
|                        |   | UUC        |           | t-GAA (2)              |             | UCC       |      | t-GGA (2)  |           | UAC  |            | t-GTA (3)      | -         |
|                        |   | UUA        | Leu       | cmnm5UmAA              | t-TAA (1)   | UCA       |      | cmo5UGA    | t-TGA (1) | UAA  | STOP       |                | UGA       |
|                        |   | UUG        |           | mCAA                   | t-CAA (1)   | UCG       |      | t-CGA      | t-CCA (1) | UAG  | STOP       |                | UGA       |
|                        | C | CUU        |           | t-GAG                  | -           | CCU       | Pro  | t-GGG      | -         | CAU  | His        | qGUG           | -         |
|                        |   | CUC        | Leu       | t-GAG (1)              |             | CCC       |      | t-GGG (1)  |           | CAC  |            | t-GTG (1)      | -         |
|                        |   | CUA        |           | cmo5UAG                | t-TAG (1)   | CCA       |      | t-TGG (1)  |           | CAA  | Gln        | cmnm5s2UUG     | t-TTG (2) |
|                        |   | CUG        |           | t-CAG (4)              |             | CCG       |      | t-CCG (1)  |           | CAG  |            | t-CTG (2)      | -         |
|                        | A | AUU        | Ile       | t-GAU                  | -           | ACU       | Thr  | t-GGU      | -         | AAU  | Asn        | qGUU           | -         |
|                        |   | AUC        |           | t-GAT (3)              |             | ACC       |      | t-GGT (2)  |           | AAC  |            | t-GTT (4)      | -         |
|                        |   | AUA        |           | t-(k2C)AU              | t-CAT (2)   | ACA       |      | cmo5UGU    | t-TGT (1) | AAA  | Lys        | mnm5s2UUU      | -         |
|                        |   | AUG        | Met       | t-CAU/CAU <sub>i</sub> | t-CAT (2/4) | ACG       |      | t-CGT (2)  |           | AAG  |            | -              | -         |
|                        | G | GUU        |           | t-GAC                  | -           | GCU       | Ala  | t-GGC      | -         | GAU  | Asp        | (gluq)GUC      | -         |
|                        |   | GUC        | Val       | t-GAC (2)              |             | GCC       |      | t-GGC (2)  |           | GAC  |            | t-GTC (3)      | -         |
|                        |   | GUA        |           | cmo5UAC                | t-TAC (5)   | GCA       |      | cmo5UGC    | t-TGC (3) | GAA  | Glu        | mnm5s2UUC      | -         |
|                        |   | GUG        |           | -                      |             | GCG       |      | -          |           | GAG  |            | -              | -         |
|                        |   |            |           |                        |             |           |      |            |           |      |            |                |           |
|                        |   |            |           |                        |             |           |      |            |           |      |            |                |           |
|                        |   |            |           |                        |             |           |      |            |           |      |            |                |           |
|                        |   |            |           |                        |             |           |      |            |           |      |            |                |           |
|                        |   |            |           |                        |             |           |      |            |           |      |            |                |           |
|                        |   |            |           |                        |             |           |      |            |           |      |            |                |           |

k<sup>2</sup>C lysidine  
cmnm5Um 5-carboxymethylaminomethyl-2'-O-methyluridin  
mC 2'-O-methylcytidine  
cmo5U uridine 5-oxyacetic acid  
q queuosine  
 $\psi$  pseudouridine  
cmnm5s2U 5-carboxymethylaminomethyl-2-thiouridine  
mnm5s2U 5-methylaminomethyl-2-thiouridine  
gluq glutamyl-queuosine  
mnm5U 5-methylaminomethyluridine

Figure S1

*E. coli* tRNA anticodon modification according to "modomics"  
Not all of isodecoder anticodons are equally modified.

|                        |   | codon | a.a. | anticodon               | tDNA        | codon | a.a. | anticodon | tDNA       | codon | a.a. | anticodon | tDNA       | codon | a.a. | anticodon | tDNA       |
|------------------------|---|-------|------|-------------------------|-------------|-------|------|-----------|------------|-------|------|-----------|------------|-------|------|-----------|------------|
| codon<br>1st<br>letter | U | UUU   | Phe  | GmAA                    | -           | UCU   |      | t-AAG     | t-AGA (11) | UAU   | Tyr  | t-GUA     | -          | UGU   | Cys  | t-GCA     | -          |
|                        |   | UUC   |      |                         | t-GAA (10)  | UCC   | Ser  | t-IGA     | -          | UAC   |      |           | t-GUA (8)  | UGC   |      | t-GCA (4) |            |
|                        |   | UUA   | Leu  | xUAA                    | t-UAA (7)   | UCA   |      | ncm5UGA   | t-UGA (3)  | UAA   | STOP |           | (eRF1)     | UGA   | STOP | (eRF1)    |            |
|                        |   | UUG   |      | m5CAA                   | t-CAA (10)  | UCG   |      | t-CGA     | t-CGA (1)  | UAG   | STOP |           | (eRF1)     | UGG   | Trp  | CmCA      | t-CCA (6)  |
|                        | C | CUU   |      | t-GAG                   | -           | CCU   |      | t-AGG     | t-AGG (2)  | CAU   | His  | t-GUG     | -          | CGU   |      | t-ACG     | t-ACG (6)  |
|                        |   | CUC   | Leu  |                         | t-GAG (1)   | CCC   | Pro  | t-IGG     | -          | CAC   |      |           | t-GUG (7)  | CGC   | Arg  | t-ICG     | -          |
|                        |   | CUA   |      | t-UAG                   | t-UAG (3)   | CCA   |      | xUGG      | t-UGG (10) | CAA   | Gln  | t-UUG     | t-UUG (9)  | CGA   |      |           | -          |
|                        |   | CUG   |      | -                       | -           | CCG   |      | -         | -          | CAG   |      | t-CUG     | t-CUG (1)  | CGG   |      | t-CCG     | t-CCG (1)  |
|                        | A | AUU   |      | t-AAU                   | t-AAU (13)  | ACU   |      | t-AGU     | t-AGU (11) | AAU   | Asn  | t-GUU     | -          | AGU   | Ser  | t-GCU     | -          |
|                        |   | AUC   | Ile  | t-IAU                   | -           | ACC   | Thr  | t-IGU     | -          | AAC   |      |           | t-GUU (10) | AGC   |      | t-GCU (4) |            |
|                        |   | AUA   |      | U( $\psi$ )AU( $\psi$ ) | t-UAU (2)   | ACA   |      | t-UGU     | t-UGU (4)  | AAA   | Lys  | mcm5s2UUU | t-UUU (7)  | AGA   | Arg  | mcm5UCU   | t-UCU (11) |
|                        |   | AUG   | Met  | t-CAU/CAU <sub>i</sub>  | t-CAU (5/5) | ACG   |      | t-CGU     | t-CGU (1)  | AAG   |      | t-CUU     | t-CUU (14) | AGG   |      | t-CCU     | t-CCU (1)  |
|                        | G | GUU   |      | t-AAC                   | t-AAC (14)  | GCU   |      | t-AGC     | t-AGC (11) | GAU   | Asp  | t-GUC     | -          | GGU   |      | t-GCC     | -          |
|                        |   | GUC   | Val  | t-IAC                   | -           | GCC   | Ala  | t-IGC     | -          | GAC   |      |           | t-GUC (16) | GGC   | Gly  |           | t-GCC (16) |
|                        |   | GUA   |      | ncm5UAC                 | t-UAC (2)   | GCA   |      | t-UGC     | t-UGC (5)  | GAA   |      | mcm5s2UUC | t-UUC (14) | GGA   |      | xUCC      | t-UCC (3)  |
|                        |   | GUG   |      | t-CAC                   | t-CAC (2)   | GCG   |      | -         | -          | GAG   | Glu  | t-CUC     | t-CUC (2)  | GGG   |      | t-CCC     | t-CCC (2)  |

Gm 2'-O-methylguanosine  
 m5 5-methylcytidine  
 $\psi$  pseudouridine  
 ncm5U 5-carbamoylmethyluridine  
 mcm5s2 5-methoxycarbonylmethyl-2-thiouridine  
 Cm methylcytidine  
 mcm5 5-methoxycarbonylmethyluridine  
 x unknown modification

Figure S2

*S. cerevisiae* tRNA anticodon modification according to "modomics"  
 Not all of isodecoder anticodons are equally modified.
